# Supplementary material for: High performance microwave absorption of light weight and porous non-carbon-based polymeric monoliths via a gel emulsion template
Source: Royal Society of Chemistry journal article supplement (doi:10.1039/d2py00002d), 2022-01-01
Supplement: d2py00002d1.pdf [file d2py00002d1.pdf]

## Supporting Information

# High Performance Microwave Absorption of Lightweight and Porous Non-carbon-based Polymeric Monoliths via Gel Emulsion Template

Cheng Zhang,<sup>\*a</sup> Yuting He,<sup>b</sup> Qingwen Song,<sup>a</sup> Yanjun Tan,<sup>a</sup> Yubo Ren,<sup>a</sup> Wei Cheng,<sup>a</sup> Runfeng Miao,<sup>a</sup> Wei Fan<sup>\*a</sup> and Deyun Zhou<sup>\*b</sup>

<sup>a</sup>Key Laboratory of Functional Textile Material and Product (Ministry of Education), School of Textile Science and Engineering, Xi'an Polytechnic University, Xi'an, Shaanxi 710048, P. R. China. E-mail: zhangcheng@xpu.edu.cn; fanwei@xpu.edu.cn

<sup>b</sup>School of Microelectronics, Northwestern Polytechnical University, Xi'an, Shaanxi 710129, P. R. China. E-mail: dyzhou@nwpu.edu.cn

### Contents

- 1) **Scheme S1.** The structure of naphthalimide (CzNI) fluorescent probe.
- 2) **Figure S1.** Gelation behaviors of the acidified aramid III fiber to the mixtures of water with different monomers, which are (a) *tert*-butyl methacrylate (*t*-BMA); (b) acrylonitrile (AN); (c) methyl methacrylate (MMA); (d) styrene (St); (e) butyl acrylate (BA); (f) glycidyl methacrylate (GMA) and (g) phenyl methacrylate (PMA), respectively.
- 3) **Figure S2.** Gelation behaviors of the acidified aramid III fiber to the mixtures of St, DVB, 2DPrEnF and water. The total volume of each mixture was kept at 2500  $\mu$ L. Water content are (a) 0%, (b) 10%, (c) 20%, (d) 30%, (e) 40%, (f) 50%, (g) 60%, (h) 70%, (i) 80%, (j) 90% and (k) 100%, respectively.
- 4) **Figure S3.** Cole-Cole curves of a) M1, b) M2, c) M3, d) M4, e) M5 and f) M6.
- 5) **Figure S4.** Impedance matching maps of a) M1, b) M2, c) M3, d) M4, e) M5 and f) M6.
- 6) **Figure S5.** <sup>1</sup>H NMR spectrum of compound 1.
- 7) **Figure S6.** <sup>13</sup>C NMR spectrum of compound 1.
- 8) **Figure S7.** HRMS of compound 1.
- 9) **Figure S8.** <sup>1</sup>H NMR spectrum of compound 2DPrEnF.
- 10) **Figure S9.** <sup>13</sup>C NMR spectrum of compound 2DPrEnF.

11) **Figure S10.** HRMS of compound 2DPrEnF.

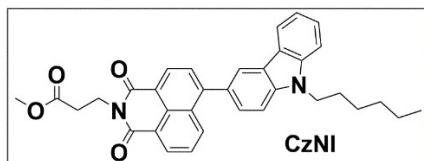

**Scheme S1.** The structure of naphthalimide (CzNI) fluorescent probe.

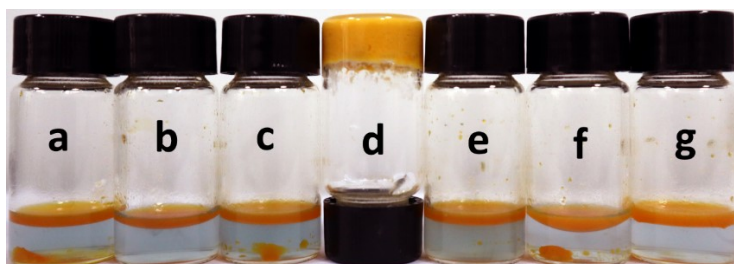

**Figure S1.** Gelation behaviors of the acidified aramid III fiber to the mixtures of water with different monomers, which are (a) *tert*-butyl methacrylate (*t*-BMA); (b) acrylonitrile (AN); (c) methyl methacrylate (MMA); (d) styrene (St); (e) butyl acrylate (BA); (f) glycidyl methacrylate (GMA) and (g) phenyl methacrylate (PMA), respectively.

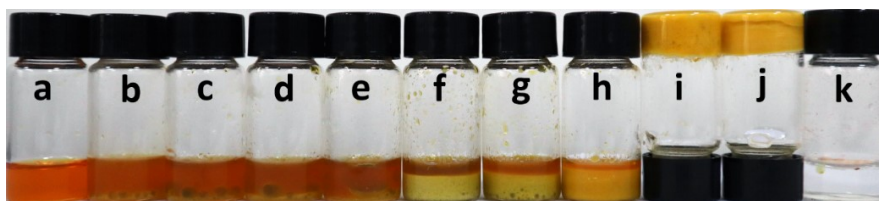

**Figure S2.** Gelation behaviors of the acidified aramid III fiber to the mixtures of St, DVB, 2DPrEnF and water. The total volume of each mixture was kept at 2500  $\mu$ L. Water content were (a) 0%, (b) 10%, (c) 20%, (d) 30%, (e) 40%, (f) 50%, (g) 60%, (h) 70%, (i) 80%, (j) 90% and (k) 100%, respectively.

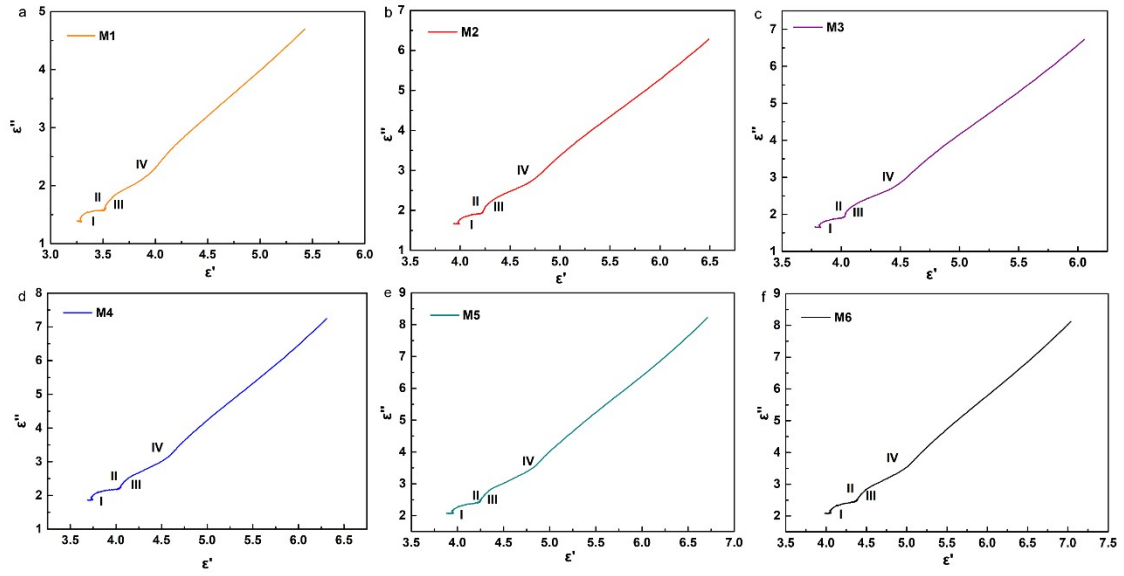

**Figure S3.** Cole-Cole curves of a) M1, b) M2, c) M3, d) M4, e) M5 and f) M6.

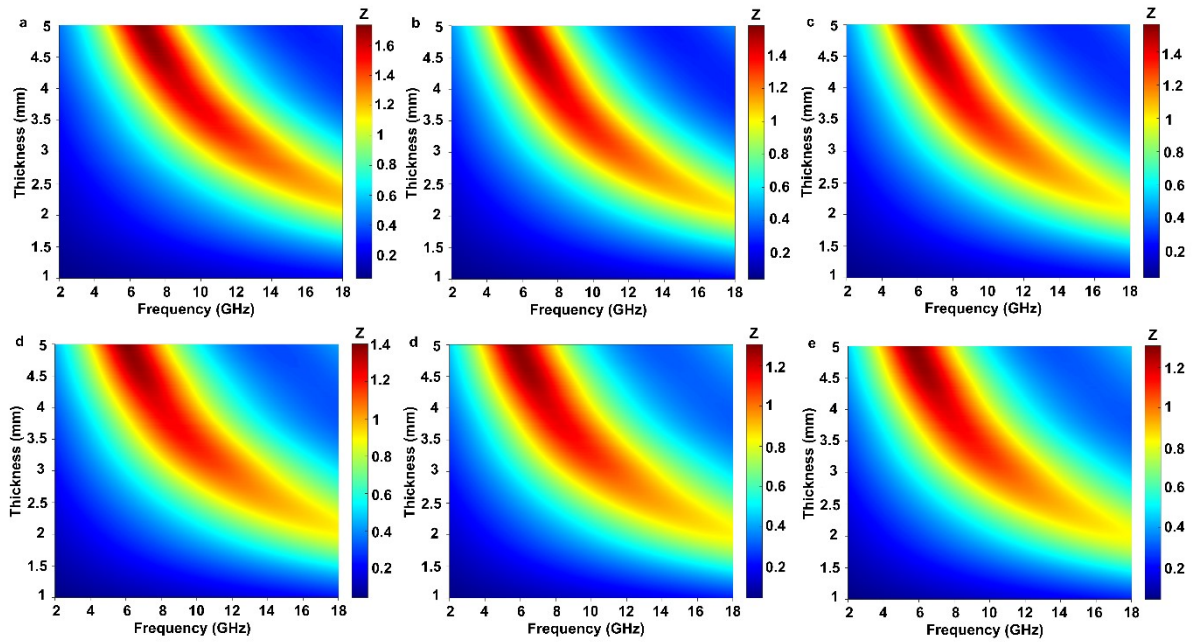

**Figure S4.** Impedance matching maps of a) M1, b) M2, c) M3, d) M4, e) M5 and f) M6.

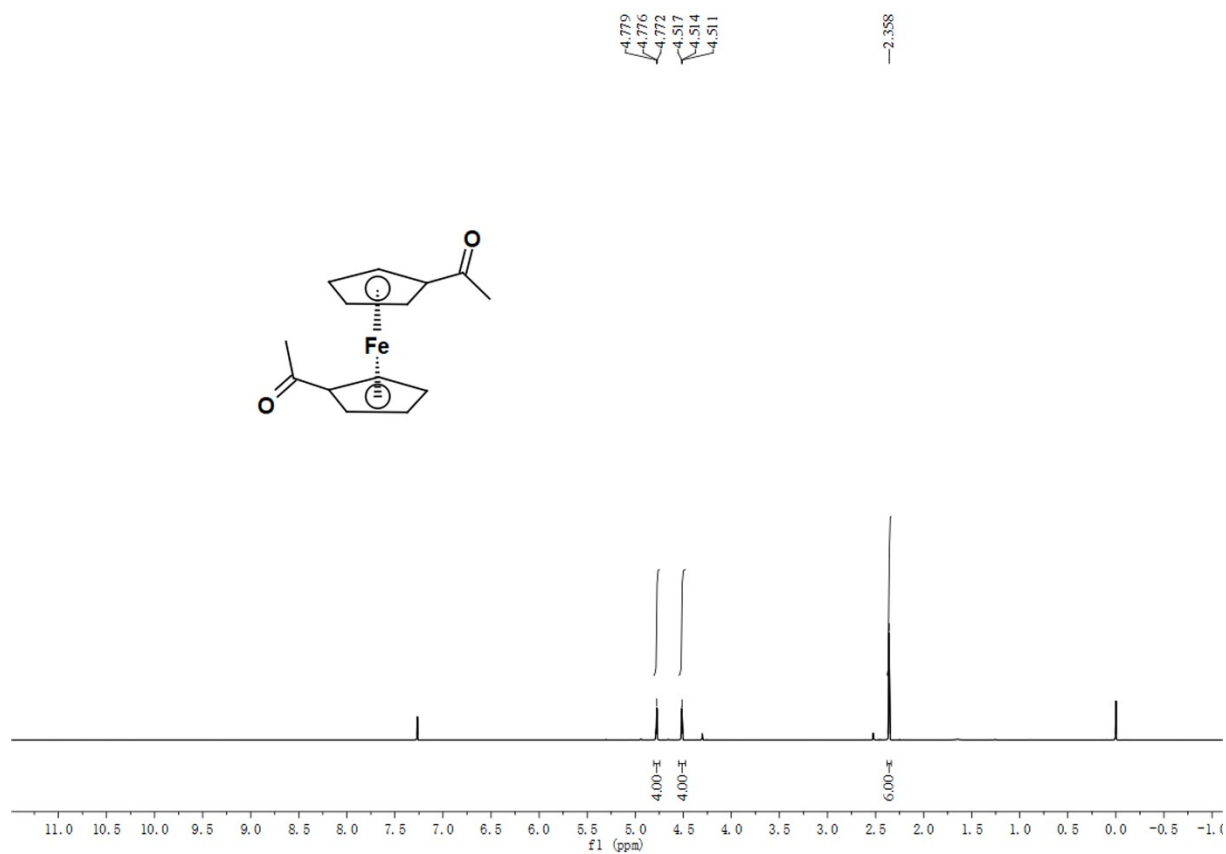

Figure S5.  $^1\text{H}$  NMR spectrum of compound 1.

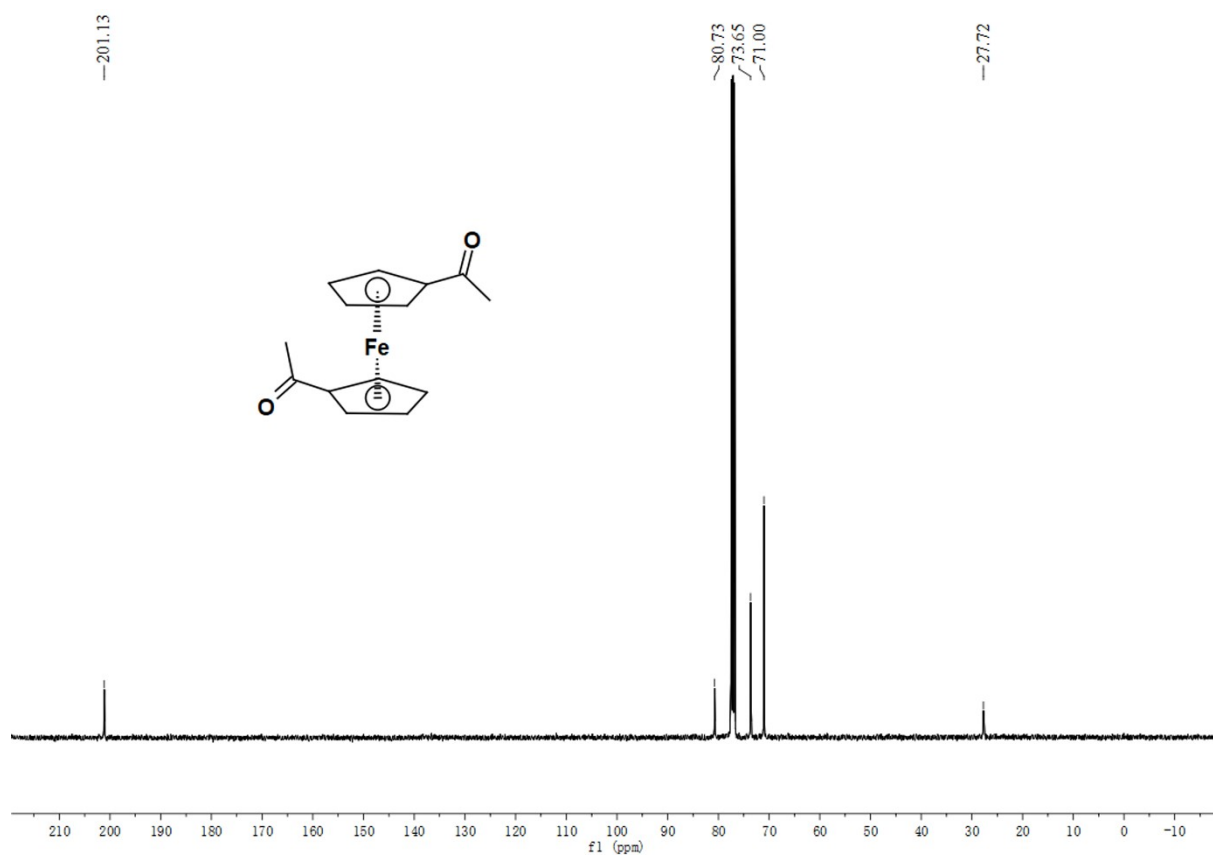

Figure S6.  $^{13}\text{C}$  NMR spectrum of compound 1.

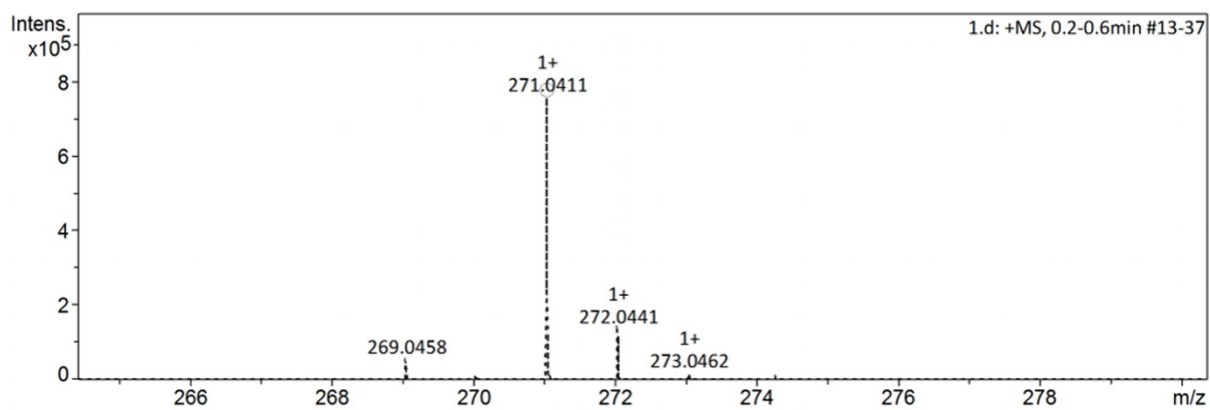

Figure S7. HRMS of compound 1.

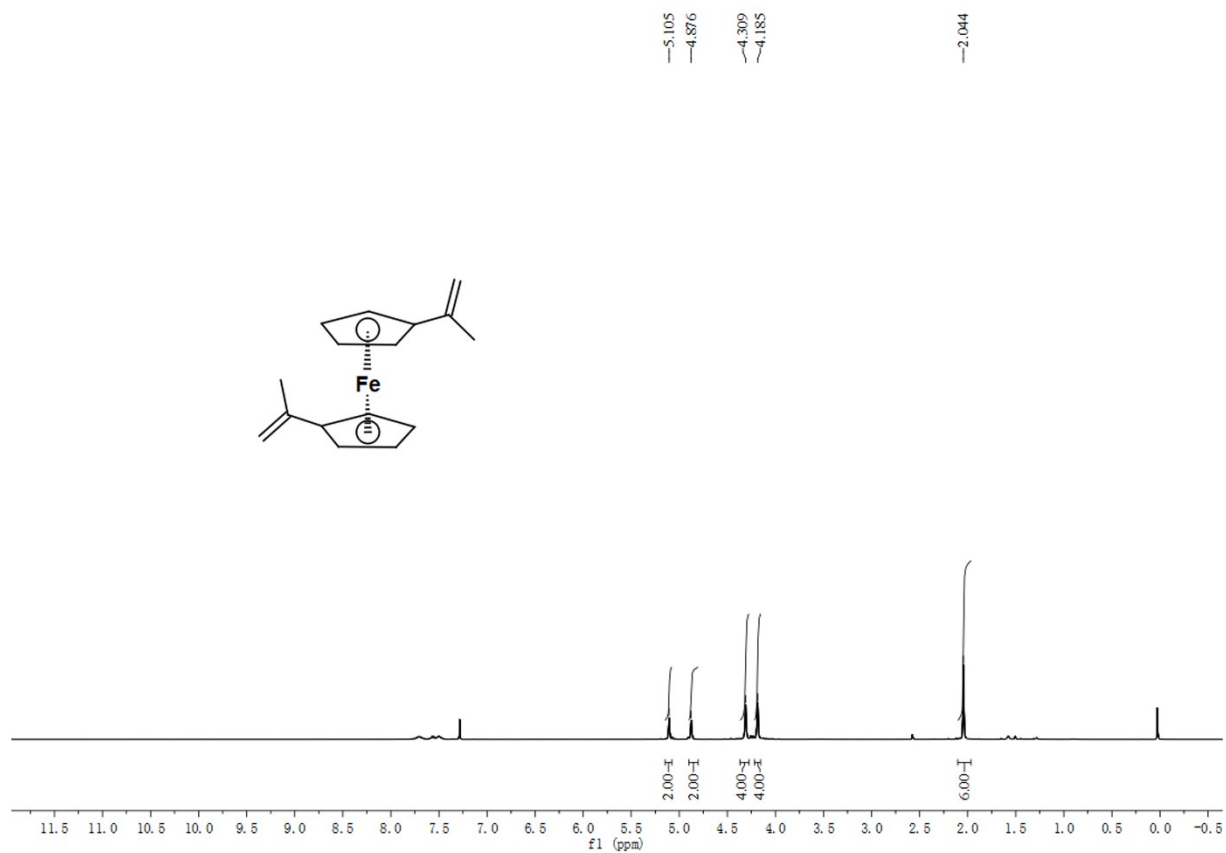

Figure S8. <sup>1</sup>H NMR spectrum of compound 2DPrEnF.

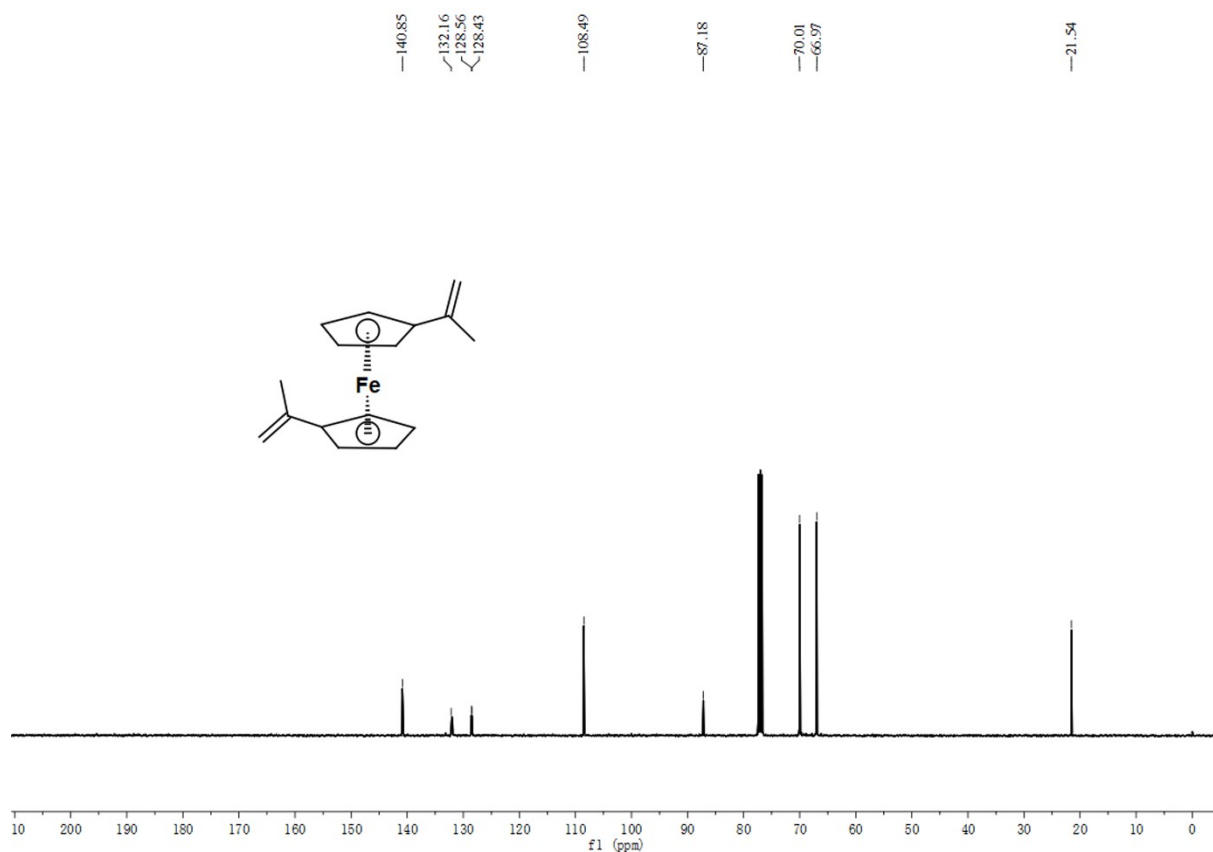

**Figure S9.**  $^{13}\text{C}$  NMR spectrum of compound 2DPrEnF.

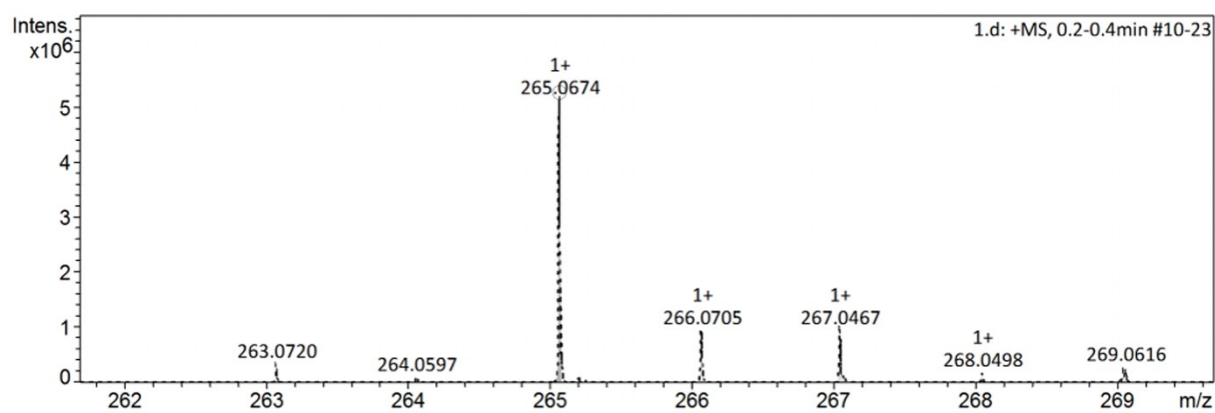

**Figure S10.** HRMS of compound 2DPrEnF.
